# Supplementary material for: Use of Household Cluster Investigations to Identify Factors Associated with Chikungunya Virus Infection and Frequency of Case Reporting in Puerto Rico
Source: PubMed Central journal article supplement (PMC5072658; doi:10.1371/journal.pntd.0005075), 2016-10-20
Supplement: pntd.0005075.s006.pdf [file pntd.0005075.s006.pdf]

## CHIKUNGUNYA INVESTIGATION — HOUSEHOLD INTERVIEW FORM

TEAM #: \_\_\_\_\_ DATE: \_\_\_\_/\_\_\_\_/\_\_\_\_ Household ID (e.g., SJ-1-A): \_\_\_\_\_-\_\_\_\_\_-\_\_\_\_\_

GPS Coordinates: \_\_\_\_\_, \_\_\_\_\_ SANID of lab-positive case: \_\_\_\_\_

How many people live in this house? \_\_\_\_\_ people  
**List all members of household below put yourself first.**

Head of household contact number to facilitate return of test results: \_\_\_\_\_

|   | <b>Name (First, Paternal, Maternal)</b> | <b>Age</b> | <b>Gender</b> | <b>Participate?</b> | <b>Place sticker here</b> |
|---|-----------------------------------------|------------|---------------|---------------------|---------------------------|
| 1 |                                         |            | M / F         | Yes / No            |                           |
| 2 |                                         |            | M / F         | Yes / No            |                           |
| 3 |                                         |            | M / F         | Yes / No            |                           |
| 4 |                                         |            | M / F         | Yes / No            |                           |
| 5 |                                         |            | M / F         | Yes / No            |                           |
| 6 |                                         |            | M / F         | Yes / No            |                           |
| 7 |                                         |            | M / F         | Yes / No            |                           |
| 8 |                                         |            | M / F         | Yes / No            |                           |

# CHIKUNGUNYA INVESTIGATION — HOUSEHOLD INTERVIEW FORM

## Household Characteristics

**Housing type (check only one):**  One story house     Two story house     Apartment/condo building

Public housing     Temporary shelter

**Has anyone in your immediate household traveled outside of Puerto Rico in the past 3 months?**     Yes     No

**Has anyone in your household been sick in the past 3 months?**     Yes     No

**Does your home have screened windows and doors?**     All rooms     Some rooms     No

**Do you regularly use air conditioning in your home?**     Yes, in all rooms     Yes, but only in some rooms     No

**Do you regularly leave your doors or windows open?**     Daytime only     Night-time only     Always     Never

**Do you use mosquito coils in your house or patio?**     Yes     No

**Do you use citronela in your house or patio to keep mosquitoes away?**     Yes     No

**Notes:**
