# Supplementary material for: Use of Household Cluster Investigations to Identify Factors Associated with Chikungunya Virus Infection and Frequency of Case Reporting in Puerto Rico
Source: PubMed Central journal article supplement (PMC5072658; doi:10.1371/journal.pntd.0005075), 2016-10-20
Supplement: pntd.0005075.s007.pdf [file pntd.0005075.s007.pdf]

# CHIKUNGUNYA INVESTIGATION — INDIVIDUAL INTERVIEW FORM

Team #: \_\_\_\_\_ Interviewer: \_\_\_\_\_ Date of interview: \_\_\_\_/\_\_\_\_/\_\_\_\_

Individual ID (e.g., SJ-1-A-1): \_\_\_\_\_-\_\_\_\_\_-\_\_\_\_\_-\_\_\_\_

1. Name: \_\_\_\_\_  
                    First (given)                      Initial                      Paternal                      Maternal

2. Gender:  Male     Female    3. Date of Birth (MM/DD/YYYY): \_\_\_\_/\_\_\_\_/\_\_\_\_

4. How long have you been living in Puerto Rico? \_\_\_\_\_ years

5. Have you been told by a clinician that you have any of the following medical conditions?

- Diabetes     High blood pressure     Heart disease     High cholesterol  
 Stroke     Kidney disease     Liver disease     Thyroid disease  
 Asthma     Lung disease     Joint disease/arthritis     Cancer

6. Do you take any of the following medications daily:

- NSAID (e.g., aspirin, Iburpofen)     Corticosteroids     Antibiotics

7. Have you experiencing any new illnesses in the past 3 months?  Yes     No  
(If more than one illness episode, detail each additional episode in Notes.)

7a. If yes, first day of illness (MM/DD/YYYY): \_\_\_\_/\_\_\_\_/\_\_\_\_

7b. What symptoms did you have (check all that apply)?

- Fever                       Chills                       Nausea/Vomiting     Diarrhea  
 Muscle pain               Joint pain                       Skin rash                       Red eyes  
 Headache                       Pain behind eyes     Abdominal pain     Cough  
 Runny nose                       Sore throat                       Calf pain                       Arthritis (red, swollen joints)

Minor bleeding (e.g., petechia, gum bleed, nosebleed, severe bruising)

Major bleeding (e.g., vomiting blood, coughing up blood, blood in stool, heavy menses)

7b-1. If you had joint pain, indicate the locations where you had the pain

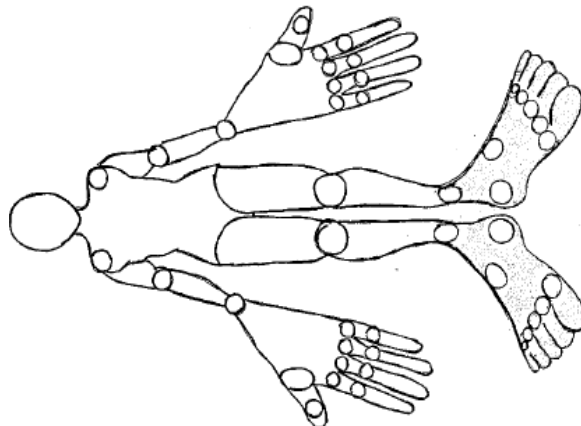

## CHIKUNGUNYA INVESTIGATION — INDIVIDUAL INTERVIEW FORM

7c. How long did this illness last? \_\_\_\_\_ days

7d. Did you go to the doctor because of this illness?  Yes  No

7d-1. If yes, Name of hospital/clinic: \_\_\_\_\_

7d-2. What was the diagnosis?  Chikungunya  Dengue

Viral syndrome  I don't know  Other: \_\_\_\_\_

7d-3. Were you hospitalized for this illness?  Yes  No

7d-3a. If yes, Hospital Name: \_\_\_\_\_

7d-3b. Days in the hospital: \_\_\_\_\_ days

8. Have you used mosquito repellent in the past month?  Daily  Weekly  Never

9. Have you slept under a bednet in the past month?  Yes  No

10. Have you traveled outside of Puerto Rico in the past 3 months?  Yes  No

10a. If yes, specify where and date of return to Puerto Rico for the most recent trip:

United States (excluding USVI)  Dominican Republic  Caribbean cruise

Other: \_\_\_\_\_

Date of return to PR (MM/DD/YYYY): \_\_\_\_\_/\_\_\_\_\_/\_\_\_\_\_

### **NOTES:**
